# Supplementary material for: Imine modified ZnO nanoparticles: a luminescent chemodosimeter for Al3+ and S2− ions based on ligand displacement reaction
Source: Royal Society of Chemistry journal article supplement (doi:10.1039/c4nj01372g), 2014-12-17
Supplement: c4nj01372g1.pdf [file c4nj01372g1.pdf]

New Journal of Chemistry

## SUPPLEMENTARY MATERIAL

### **Imine modified ZnO nanoparticles: luminescent chemodosimeter for $\text{Al}^{3+}$ and $\text{S}^{2-}$ ions based on ligand displacement reaction**

Kamaljot Kaur, Savita Chaudhary, Sukhjinder Singh and Surinder Kumar Mehta\*

Department of Chemistry and Centre of Advanced Studies in Chemistry, Panjab University,  
Chandigarh 160 014, India.

\* Corresponding author

E-mail address: skmehta@pu.ac.in

Tel: +91 172 2534423; Fax: +91 172 2545074

Date: 15. 12. 2014

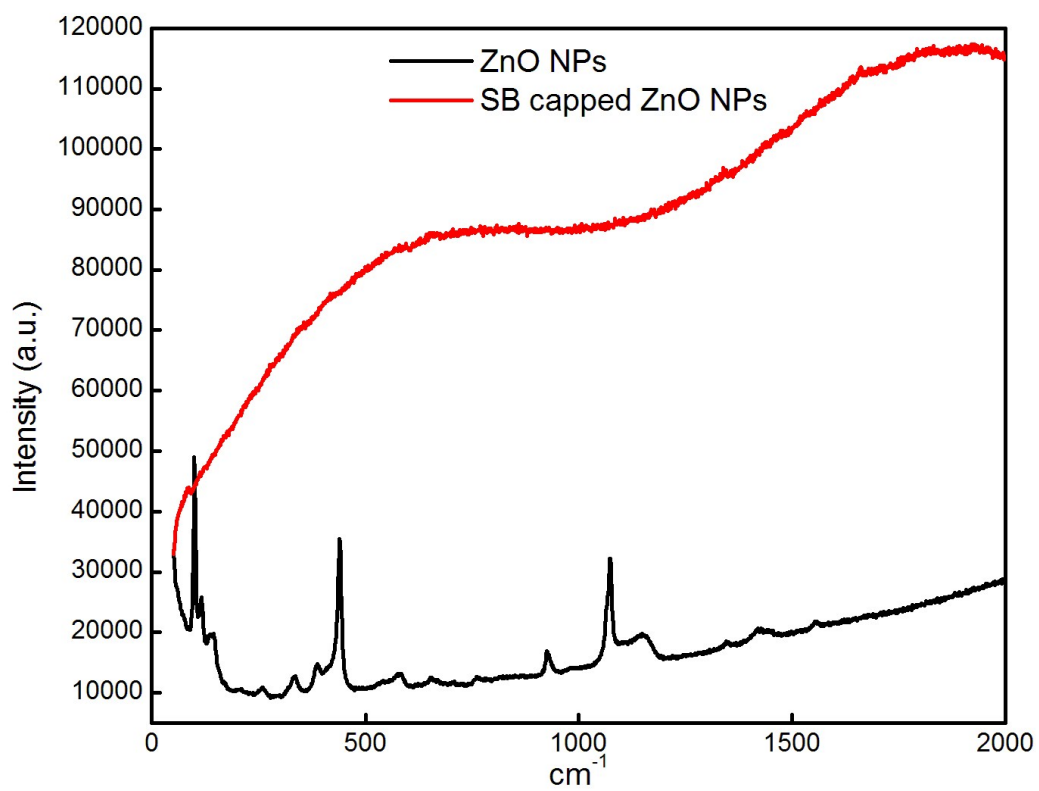

**Fig. S1.** Raman spectra of bare and capped ZnO NPs.

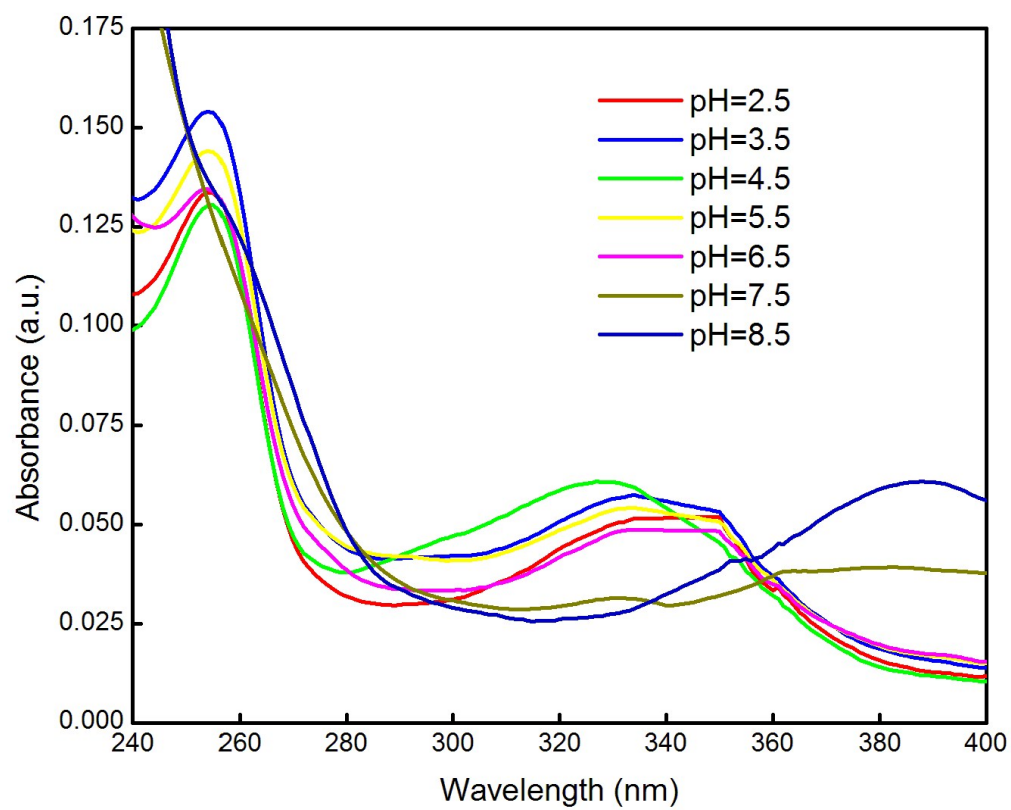

**Fig. S2.** Variation in absorbance of SB probe L alone in methanol: water (v/v, 1:99), measured over pH range of 2.5-8.5.

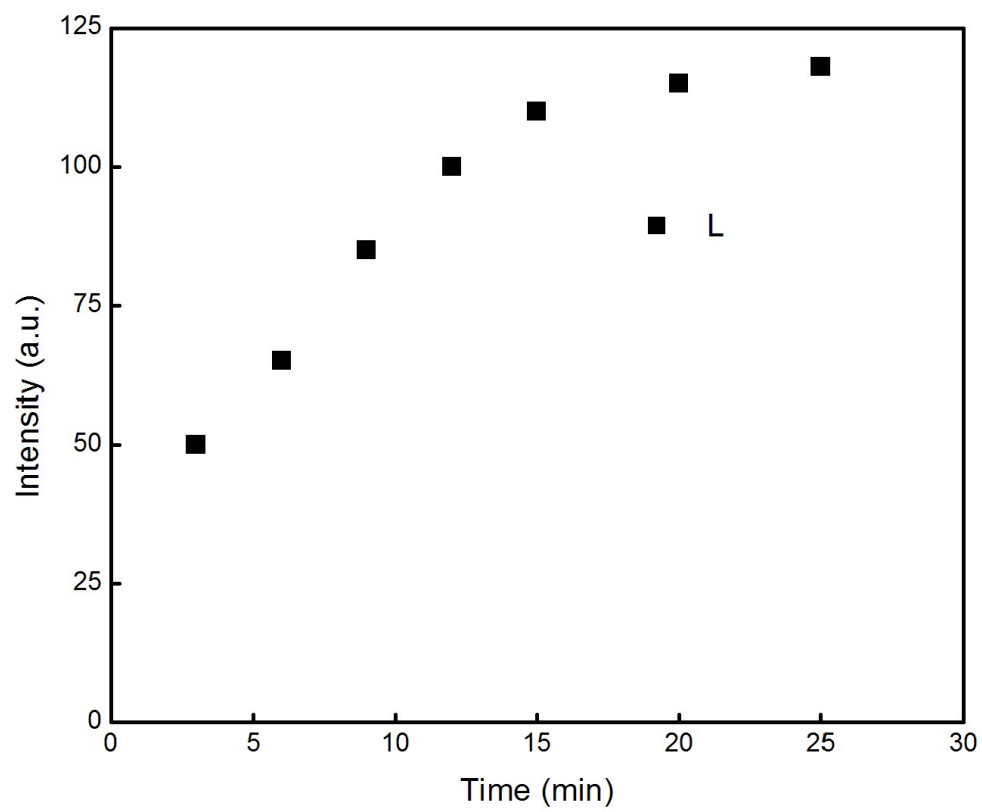

**Fig. S3.** Variation in emission intensity of probe L with increase in sonication time.

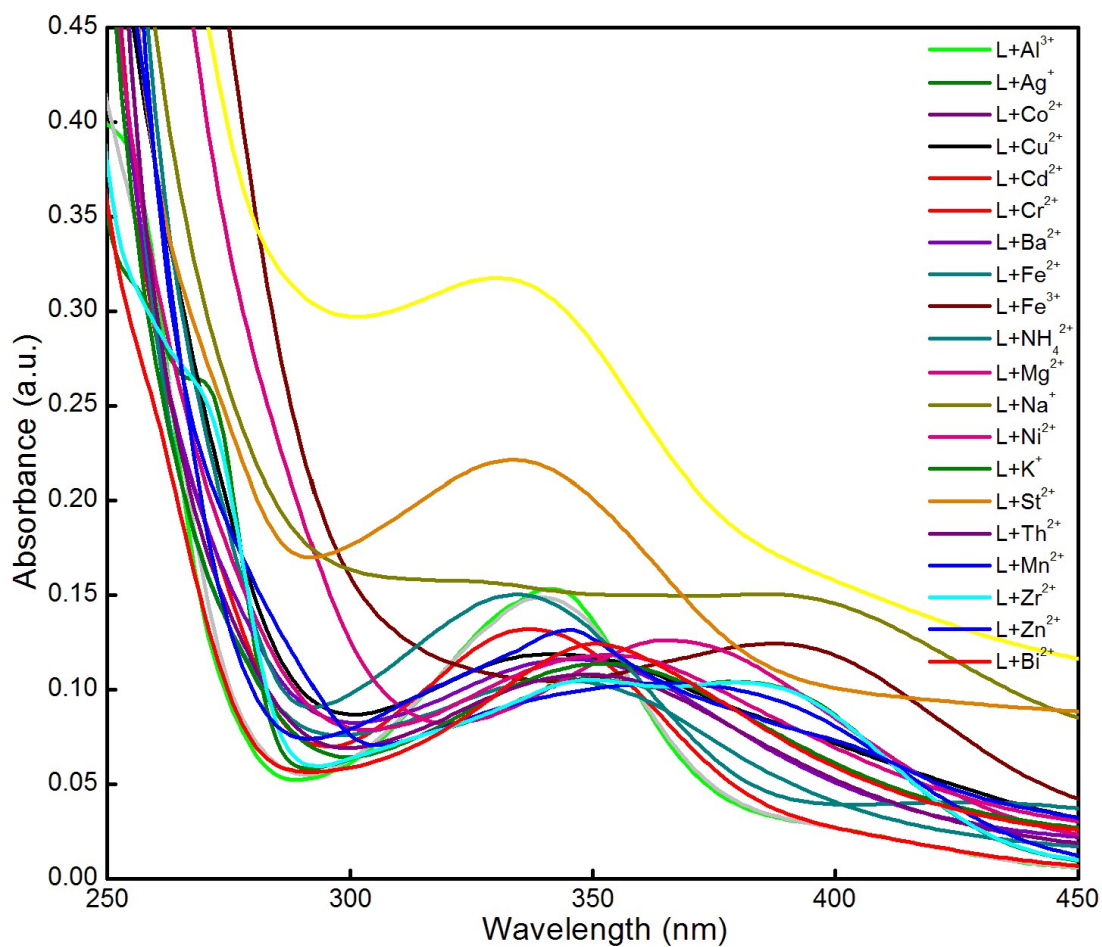

**Fig. S4.** Absorbance spectra of sensor L after addition of different metal ions (10  $\mu$ M) in methanol: water (v,v/1:99) at pH  $\approx$  7.5.

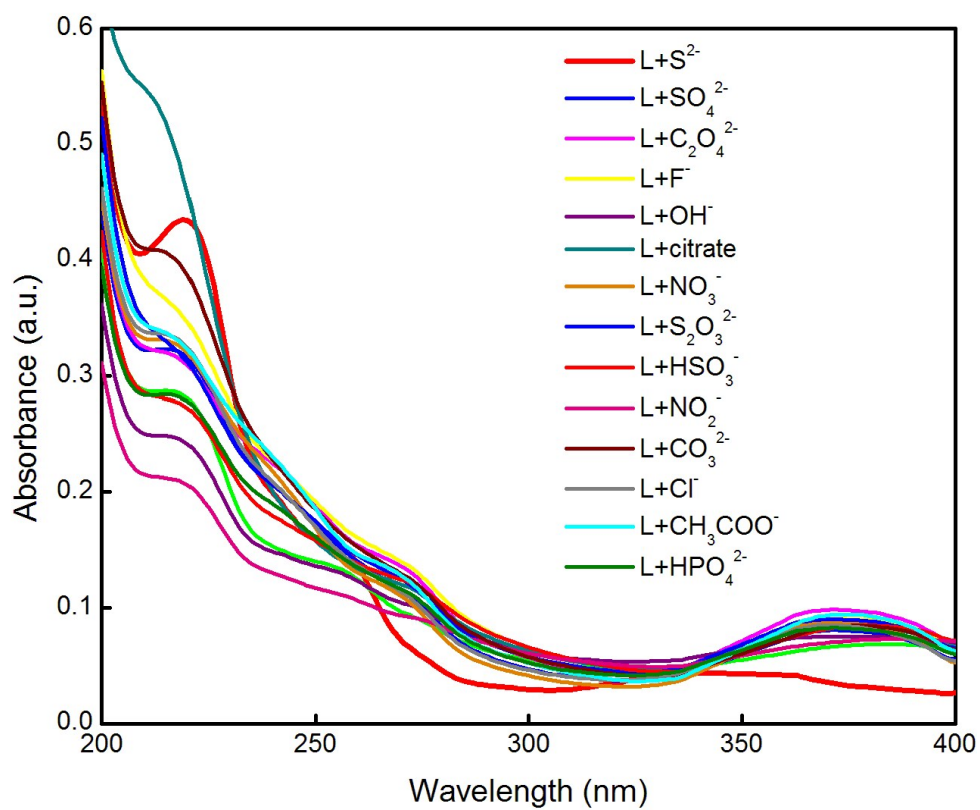

**Fig. S5.** Absorbance spectra of sensor L after addition of different anions (10  $\mu$ M) in methanol: water (v,v/1:99) at pH  $\approx$  7.5.

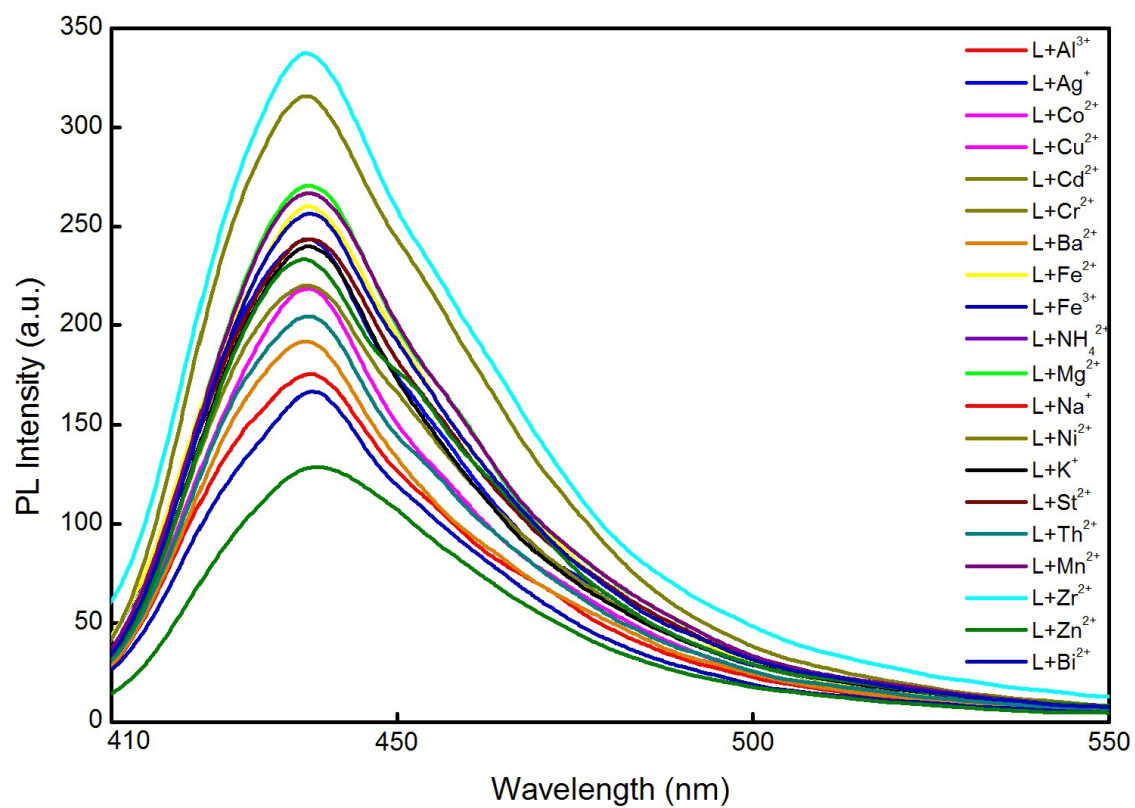

**Fig. S6.** Emission profile of sensor L (1 mg) after addition of different metal ions (10  $\mu$ M) in 100% aqueous system.

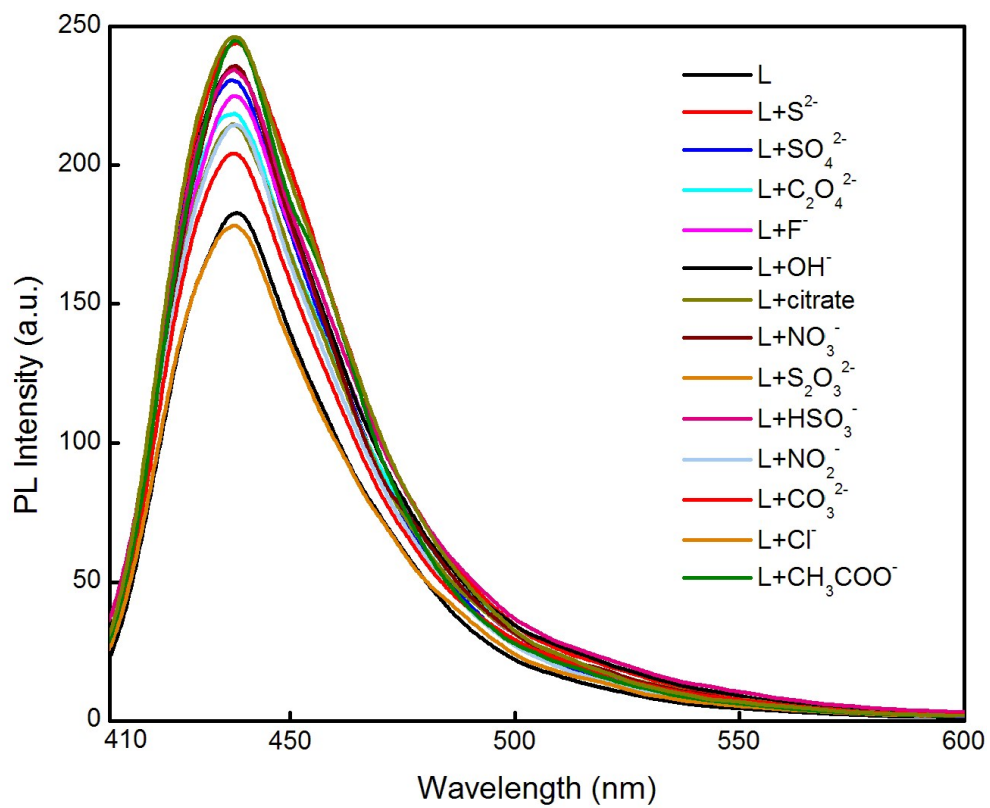

**Fig. S7.** Emission profile of sensor L (1 mg) after addition of different anions (10  $\mu$ M) in 100% aqueous system.

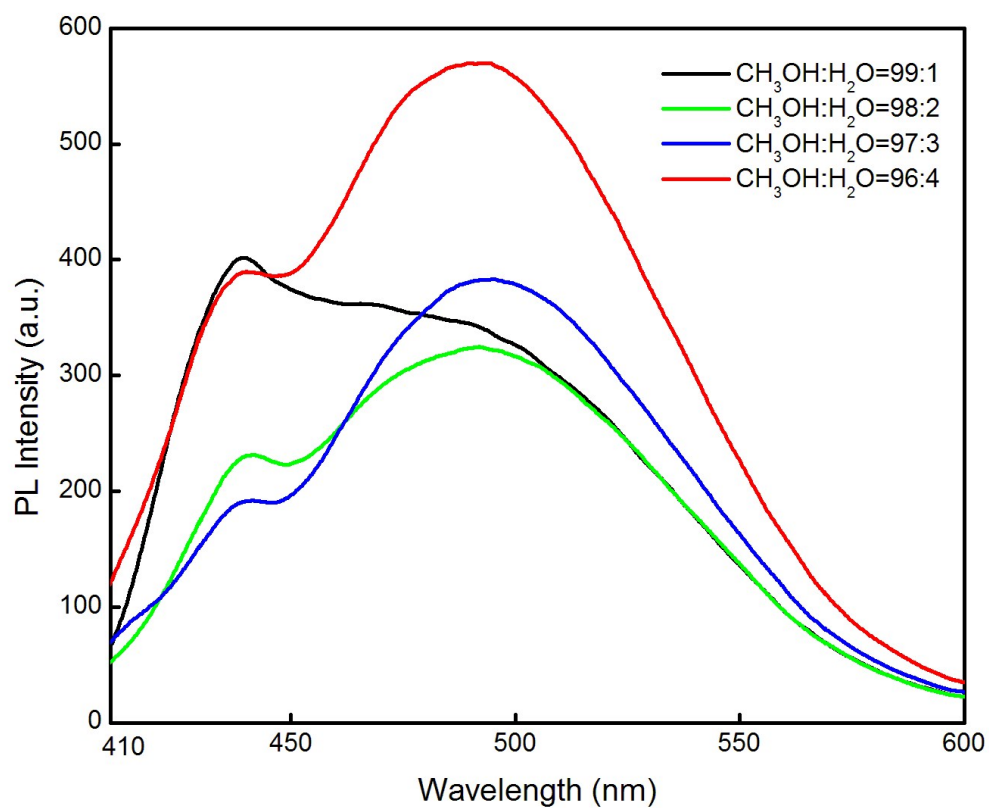

**Fig. S8.** Emission shift of ZnO capped NPs after addition of  $\text{Al}^{3+}$  ions in different solvent systems.

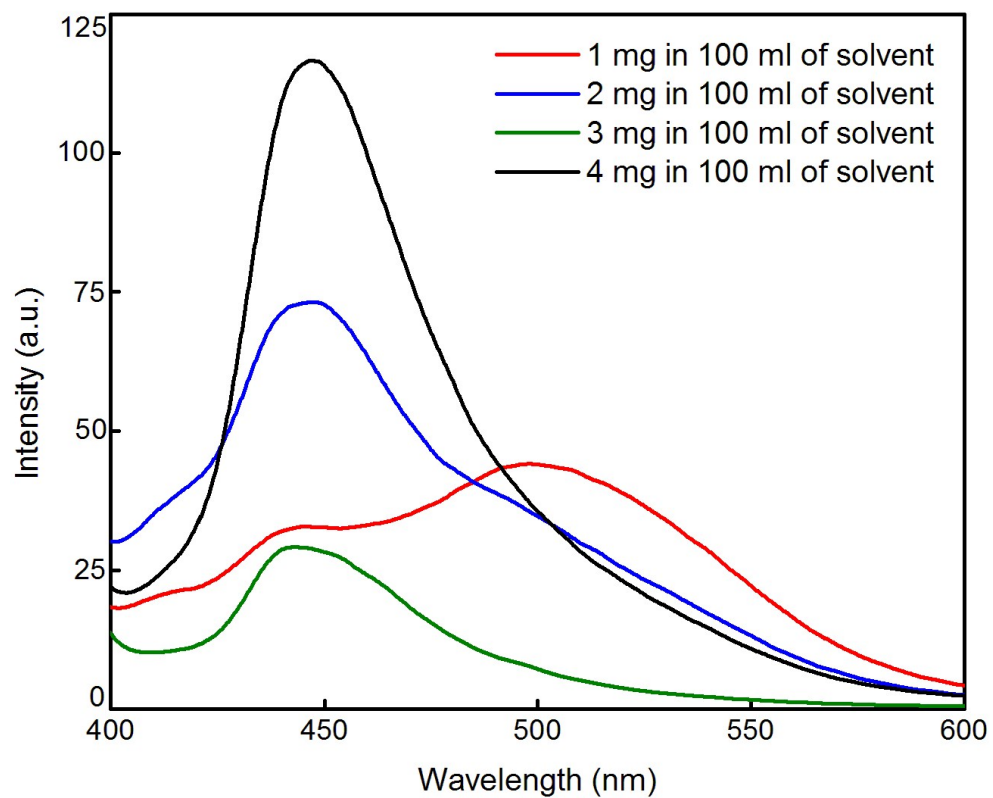

**Fig. S9.** Effect of change in the doze amount (L) on the variation of intensity at 445 and 500 nm.

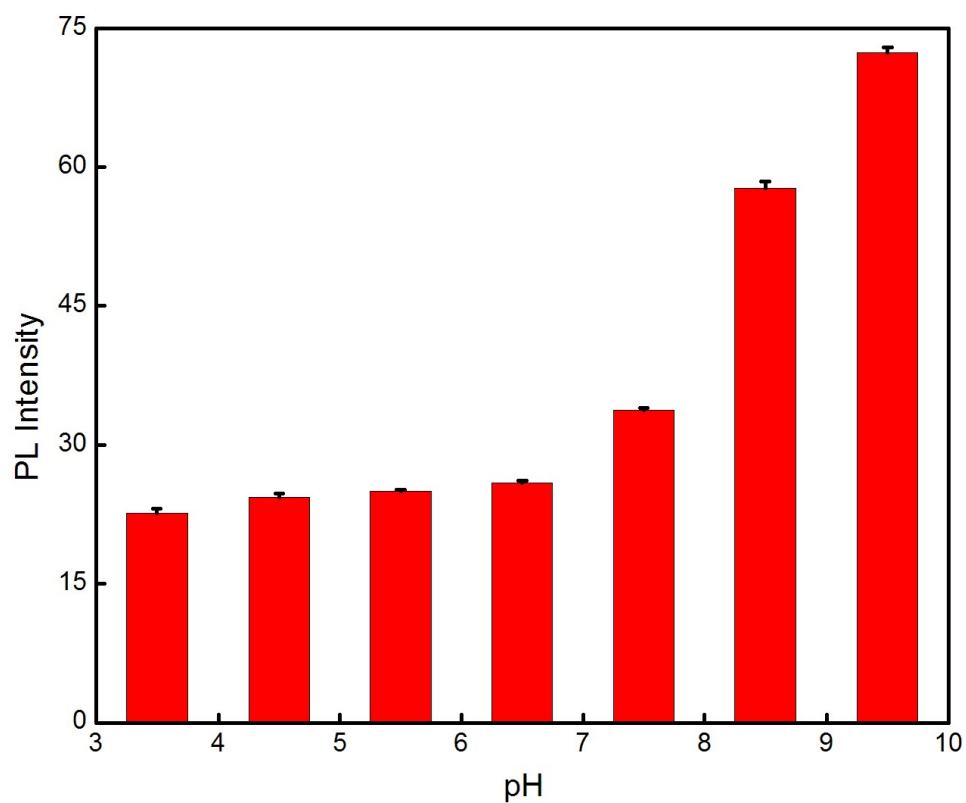

**Fig. S10.** Standard deviations after 3 repetitions for variation in emission signal of probe L in presence of  $\text{Al}^{3+}$  ions in methanol: water (v/v, 1:99), measured over pH range of 2.5-8.5 ( $\lambda_{\text{max}} = 500 \text{ nm}$ ).

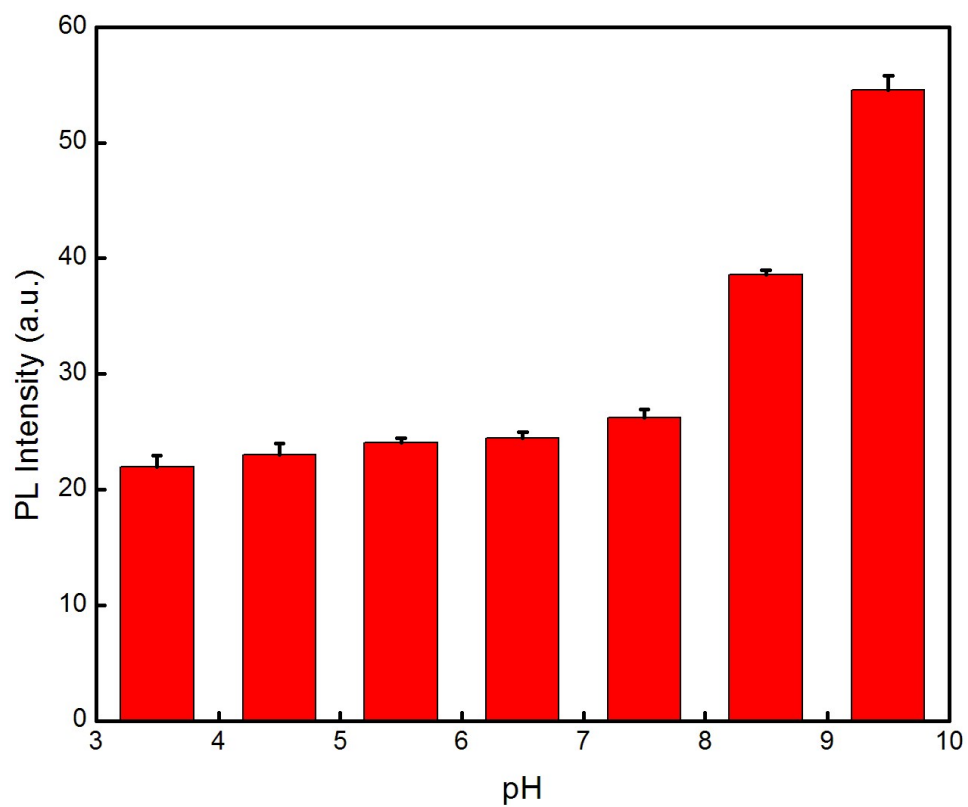

**Fig. S11.** Standard deviations after 3 repetitions for variation in emission signal of probe L in presence of  $S^{2-}$  ions in methanol: water (v/v, 1:99), measured over pH range of 2.5-8.5 ( $\lambda_{\text{max}} = 500$  nm).

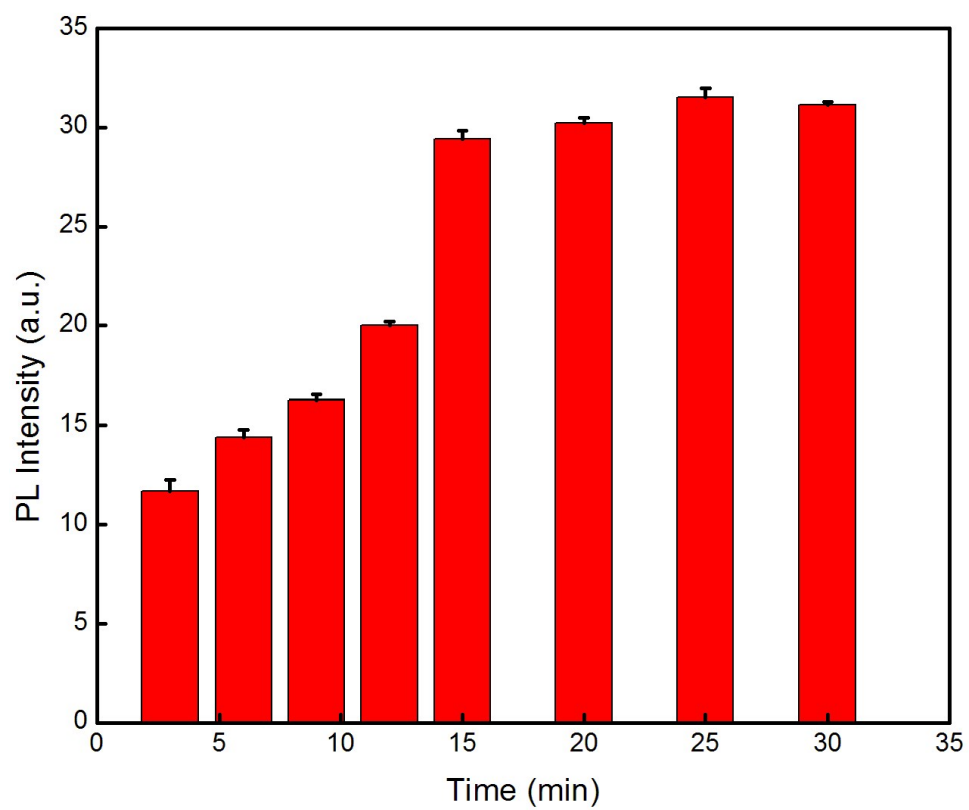

**Fig. S12.** Standard deviations after 3 repetitions for variation in emission intensity of probe L with time after interaction with  $\text{Al}^{3+}$  ions.

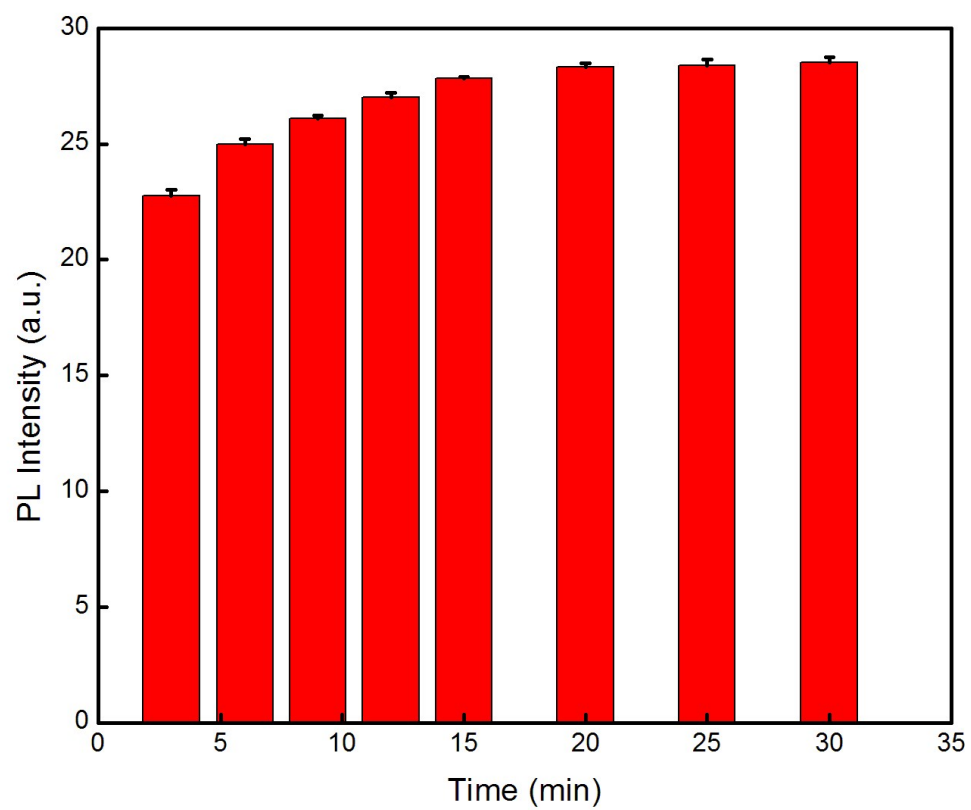

**Fig. S13.** Standard deviations after 3 repetitions for variation in emission intensity of probe L with time after interaction with  $S^{2-}$  ions.

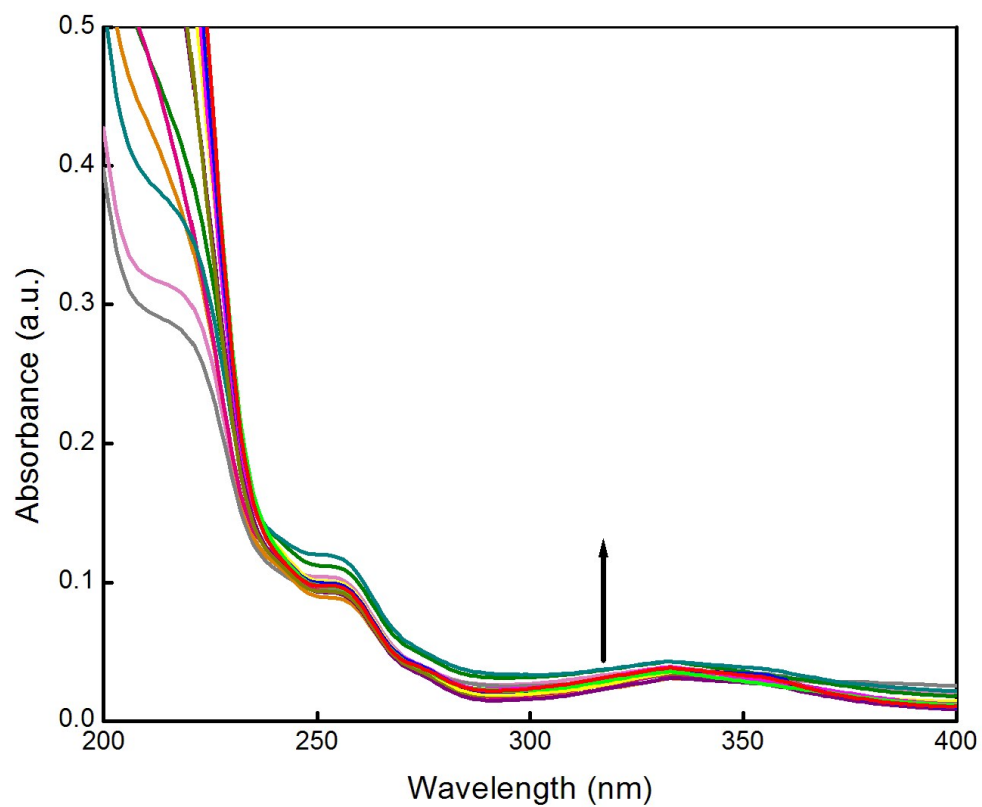

**Fig. S14.** UV-vis spectra of sensor L in the presence performed by adding different amounts of  $\text{Al}^{3+}$  ranging from 1 nm to 100 nm in methanol: water (v/v, 1:9) at  $\text{pH} \approx 7.5$ .

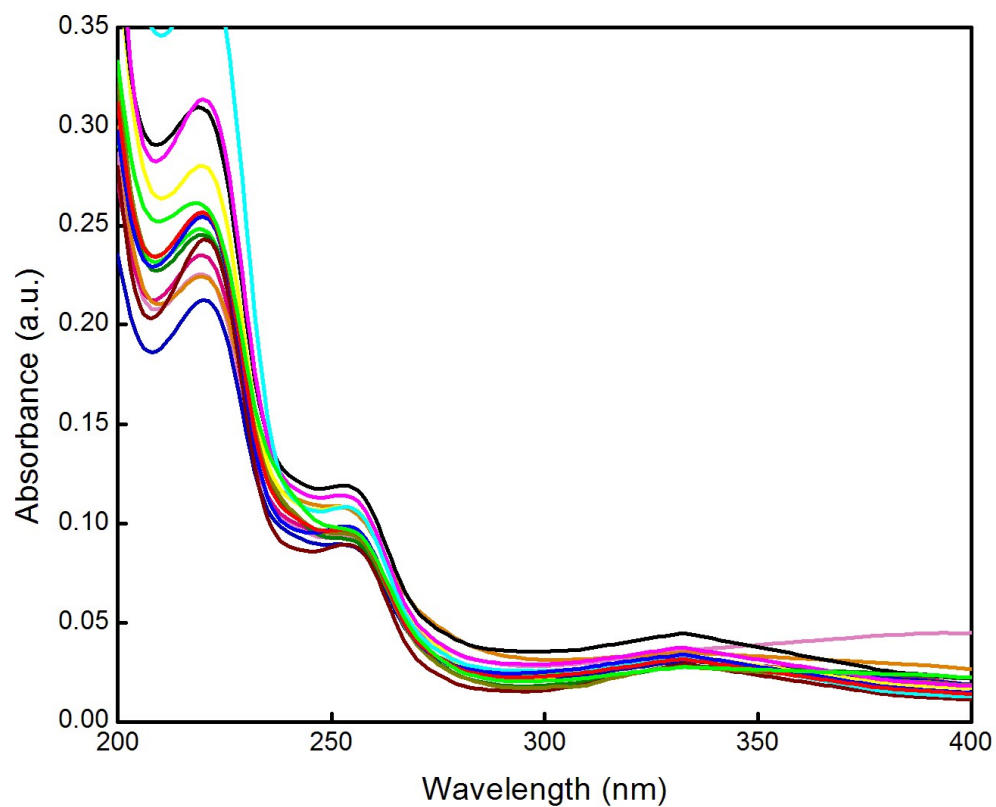

**Fig. S15.** UV-vis spectra of sensor L in the presence performed by adding different amounts of  $S^{2-}$  ranging from 50 nM to 50  $\mu$ M in methanol: water (v/v, 1:9) at pH  $\approx$  7.5.

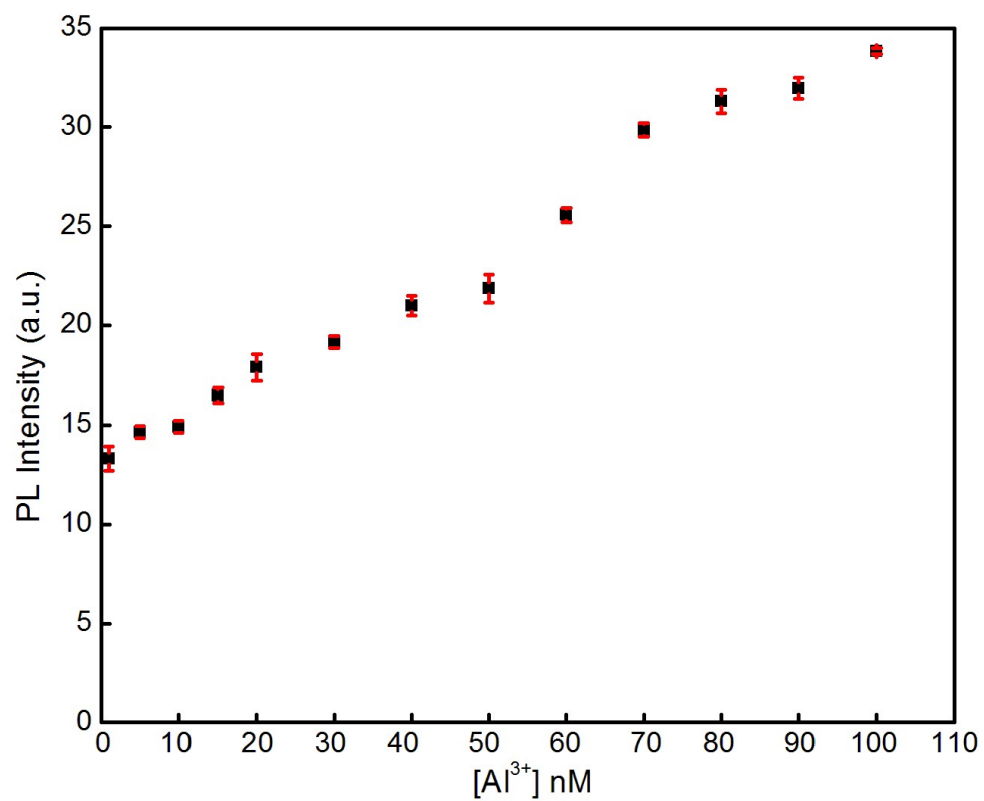

**Fig. S16.** Standard deviations after 3 repetitions for emission enhancement versus concentration of  $Al^{3+}$  ions ( $\lambda_{max} = 500$  nm).

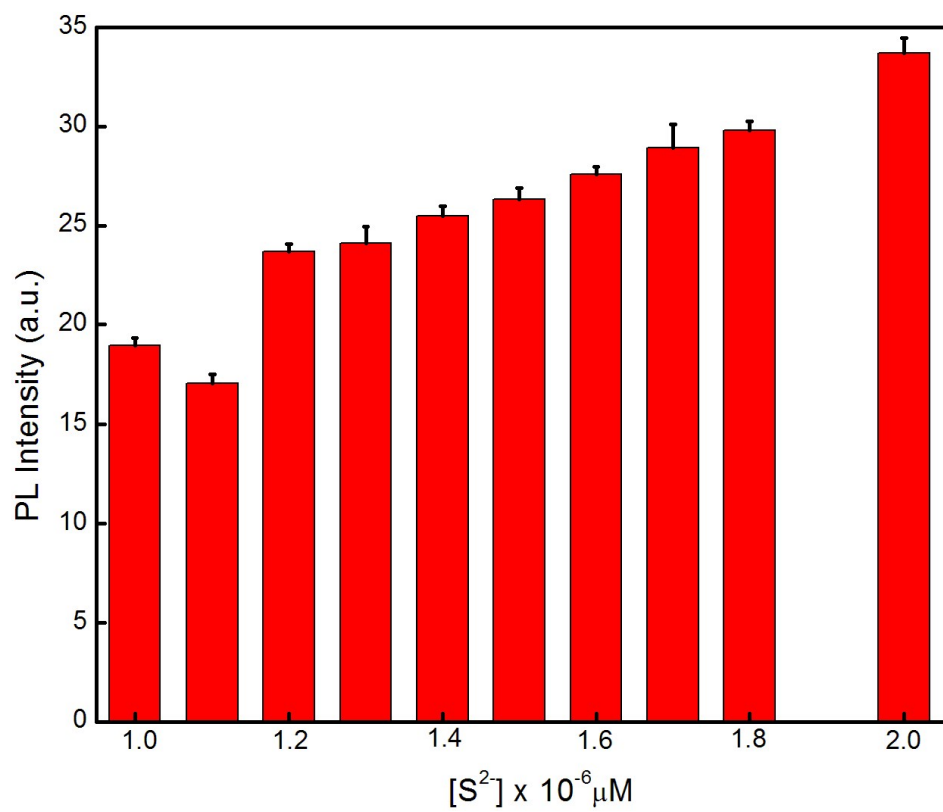

**Fig. S17.** Standard deviations after 3 repetitions for emission enhancement versus concentration of S<sup>2-</sup> ions ( $\lambda_{\text{max}} = 500 \text{ nm}$ ).

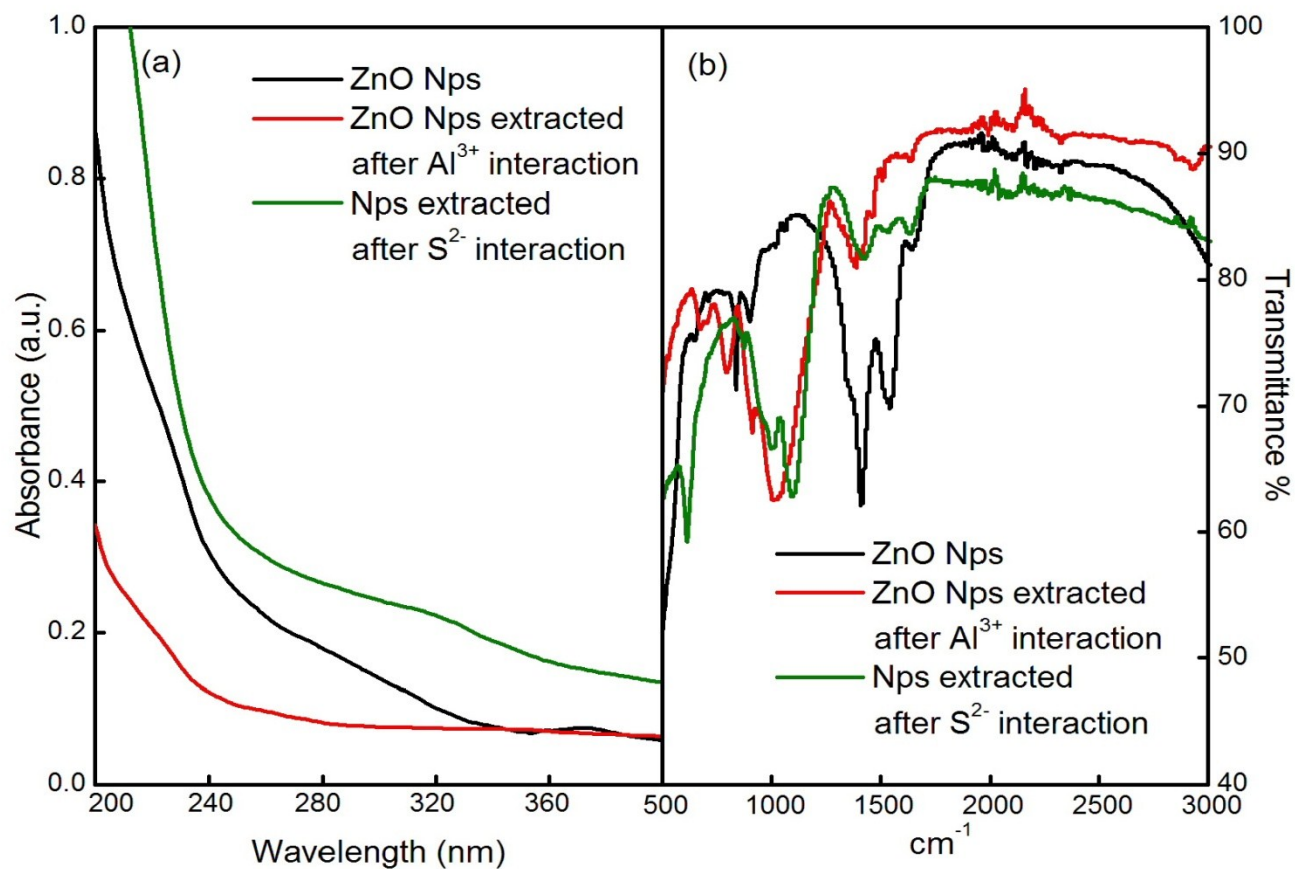

**Fig. S18.** UV-vis (a) and IR (b) spectra of ZnO NPs before and after interaction with  $\text{Al}^{3+}$  and  $\text{S}^{2-}$  ions.

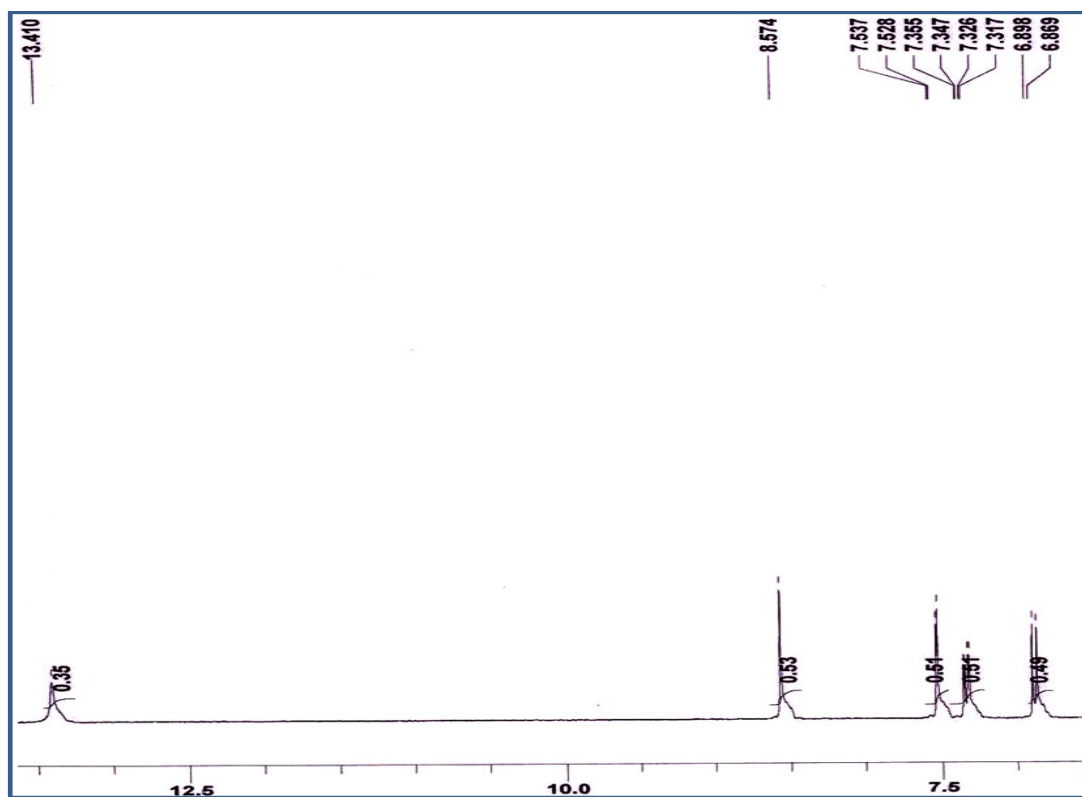

**Fig. S19.** <sup>1</sup>H NMR spectrum in DMSO-d<sub>6</sub> for SB.

**Table S1.** Elemental analysis data for compound SB

|                                          | <b>Nitrogen</b> | <b>Carbon</b> | <b>Hydrogen</b> |
|------------------------------------------|-----------------|---------------|-----------------|
| <b>Precentage %<br/>(Found/Required)</b> | 7.92/8.2        | 56.82/56.63   | 4.12/ 4.71      |
